# Supplementary material
Source: publisher site journal article supplement (https://www.dovepress.com/article/382302)
Supplement: Supplementary file 1 [file get_supplementary_file.php]

# Photodynamic therapy and antibacterial activities of a novel synthesized quaternary Zn-Cu-In-S/ZnS QDs- mTHPP Porphyrin conjugate.

Ncediwe Tsolekile 1,2,3, Sundararajan Parani 2,3, Erenilda Ferreira de Macedo 4, Thabang Calvin Lebepe 2,3, Rodney Maluleke 2,3, Vuyelwa Ncapayi 2,3, Mangaka Clara Matoetoe 1, Sandile Phinda Songca 5, Katia Conceição 6, Dayane Batista Tada 4, and Oluwatobi Samual Oluwafemi 2,3

1Department of Chemistry, Cape Peninsula University of Technology, PO Box 652, Cape Town 2000, South Africa.

2Department of Chemical Sciences, University of Johannesburg, P. O. Box 17011, Doornfontein 2028, Johannesburg, South Africa.

3Centre for Nanomaterials Science Research, University of Johannesburg, Johannesburg, South Africa.

4Laboratory of Nanomaterials and Nanotoxicology, Institute of Science and Technology, Federal University of São Paulo, SP, Brazil.

5Department of Chemistry, University of KwaZulu-Natal, Private Bag X 54001, Durban, 4000, South Africa.

6Laboratory of Peptide Biochemistry, Institute of Science and Technology, Federal University of São Paulo, SP, Brazil.

Correspondence: [Oluwatobi Samual Oluwafemi]

Department of Chemical Sciences, University of Johannesburg, P. O. Box 17011, Doornfontein 2028, Johannesburg, South Africa.]

Tel [+27 011 559 9060]

Email : [*oluwafemi.oluwatobi@gmail.com*](mailto:oluwafemi.oluwatobi@gmail.com)

Correspondence: [Dayane Batista Tada], Laboratório de Nanomateriais e Nanotoxicologia, Universidade Federal de São Paulo, Talim, 330 - Vila Nair, São José dos Campos, SP, 12231-280, Brazil.

Email : [*day.tada@gmail.com*](mailto:day.tada@gmail.com)


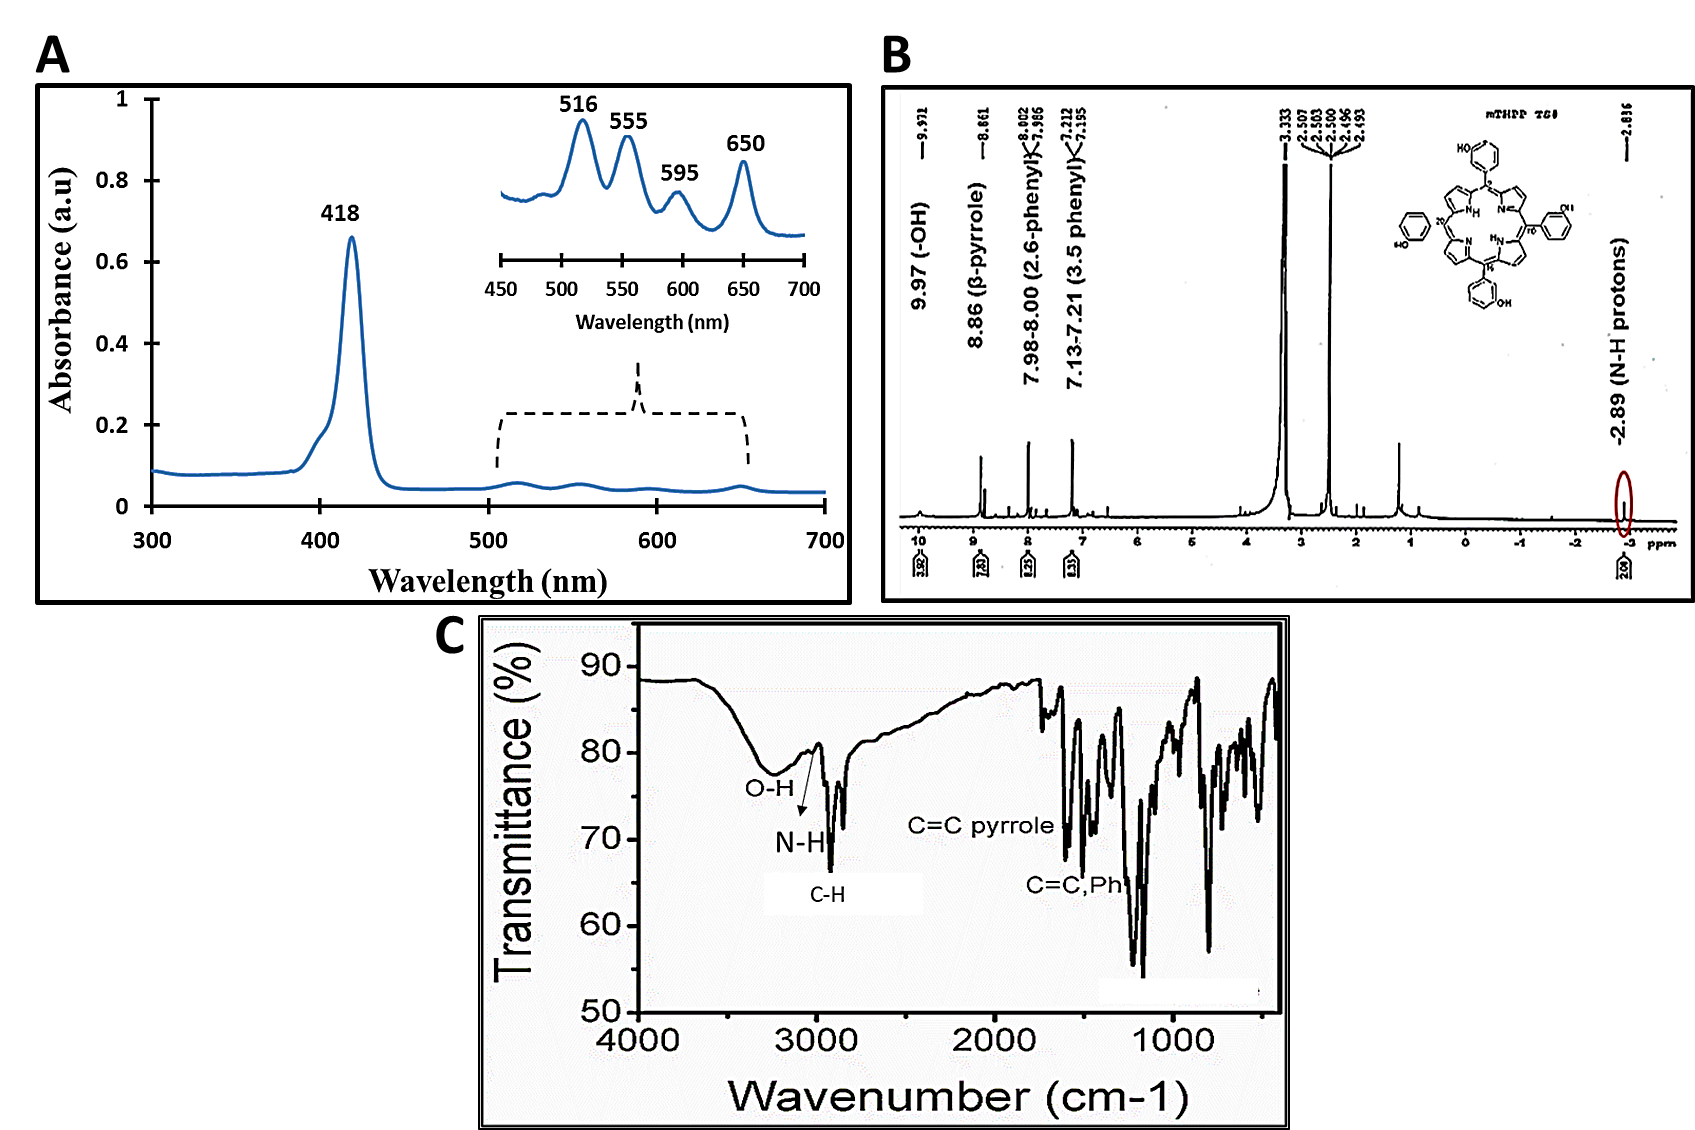


**Figure S1:** NMR spectrum of mTHPP.

1HNMR _H(DMSO-d6): 9.99(s, 4H, −OH), 8.85(s, 8H, _-Pyrrole), 7.97(d, 8H, 2,6- phenyl), 7.18(d, 8H, 3,5-Phenyl), −2.92(s, 2H, NH-pyrrole). *λ*max(MeOH): 418 nm (Soret), 516, 555, 595, 650 nm.


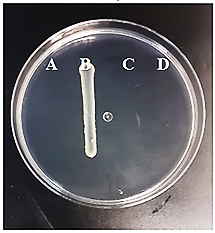


**Figure S2:** (A) Seeding of E. coli incubated with antibiotic (B) E. coli incubated with culture medium (C) culture medium and autoclaved water without bacteria (D) culture medium without bacteria.
